# Supplementary material for: Serinc2 deficiency causes susceptibility to sepsis-associated acute lung injury
Source: PubMed Central journal article supplement (PMC9260995; doi:10.1186/s12950-022-00306-x), 2022-07-07
Supplement: 12950_2022_306_MOESM2_ESM.pdf [file 12950_2022_306_MOESM2_ESM.pdf]

Figure 1C

SERINC2

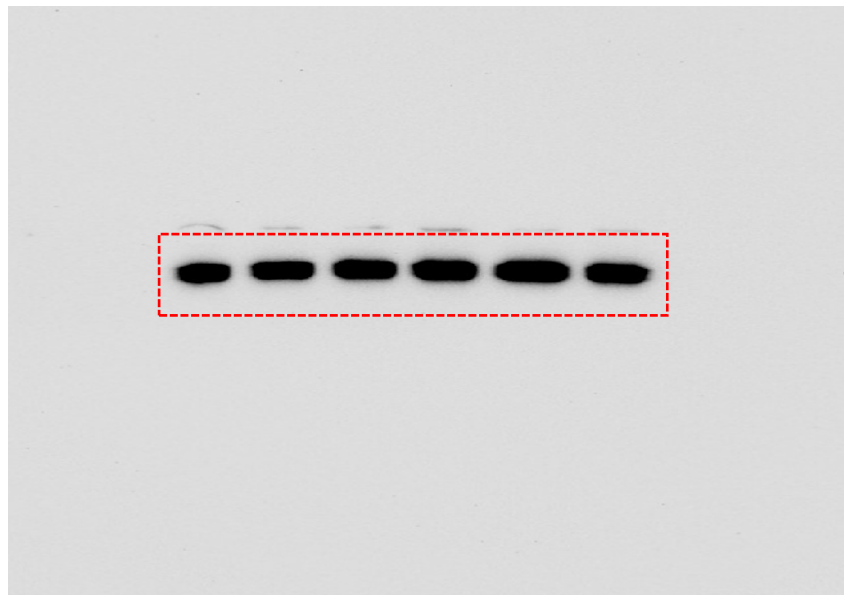

40kD

GAPDH

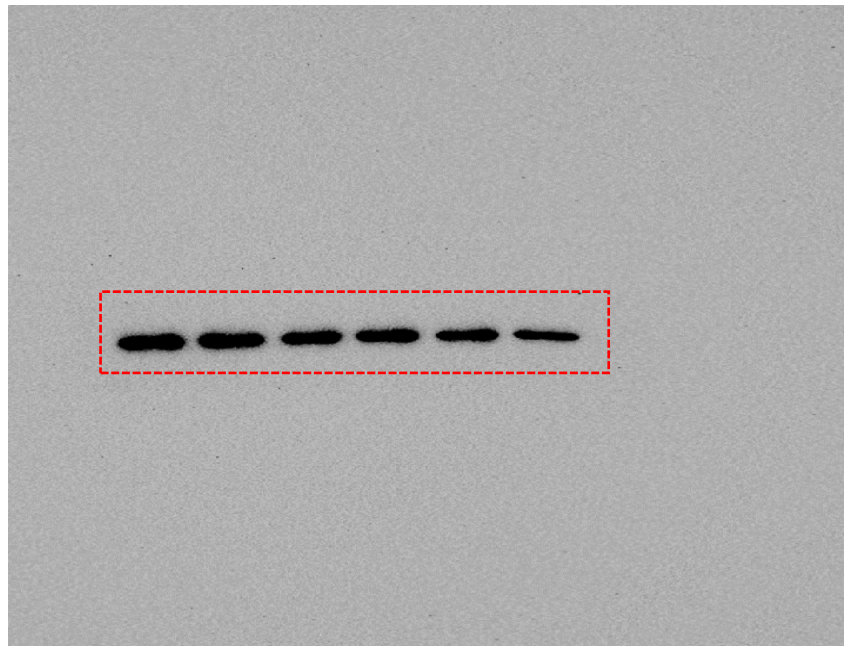

37kD

Figure 1F

SERINC2

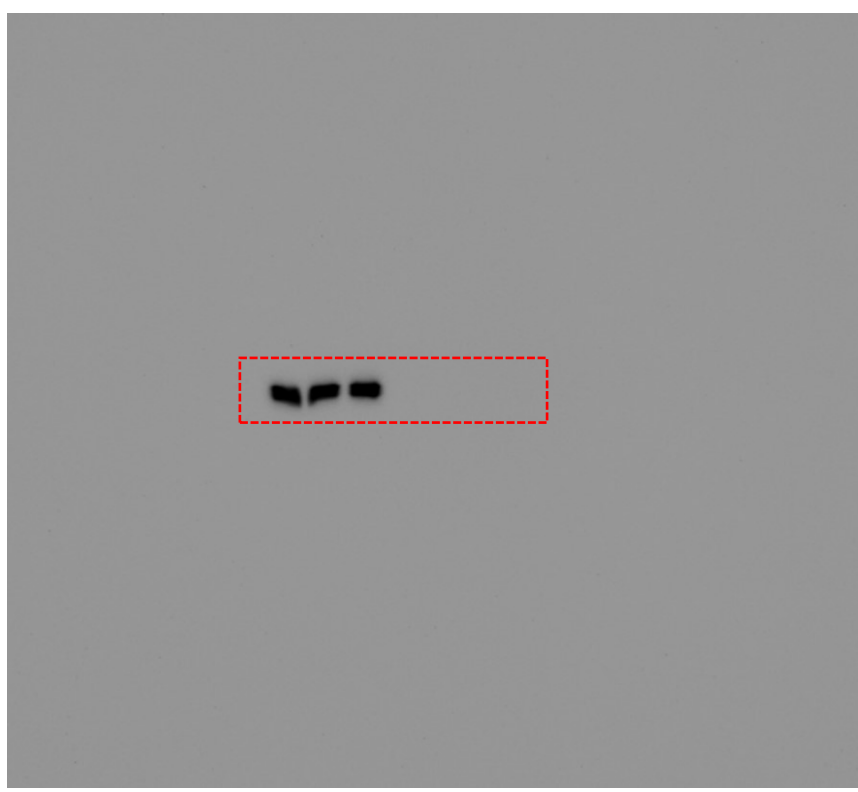

40kD

GAPDH

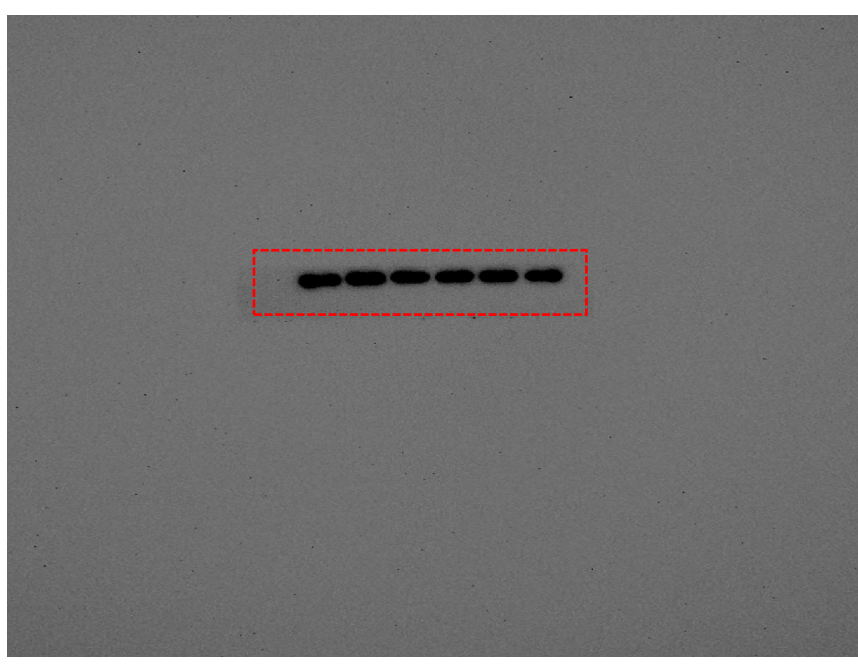

37kD

Figure 2C

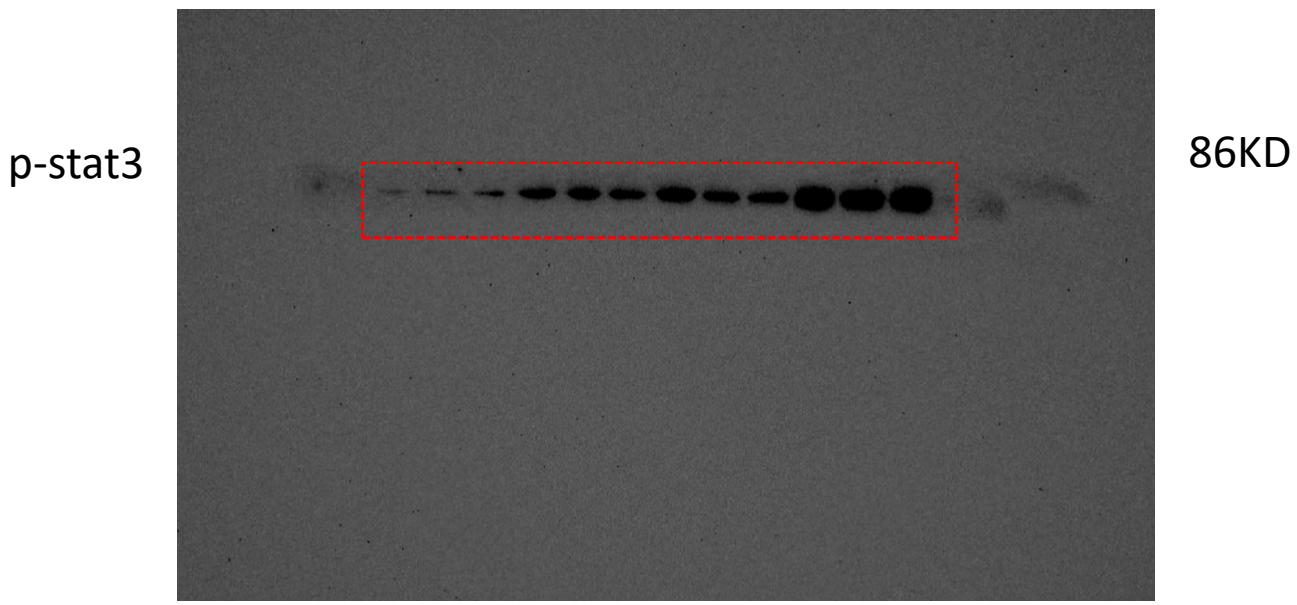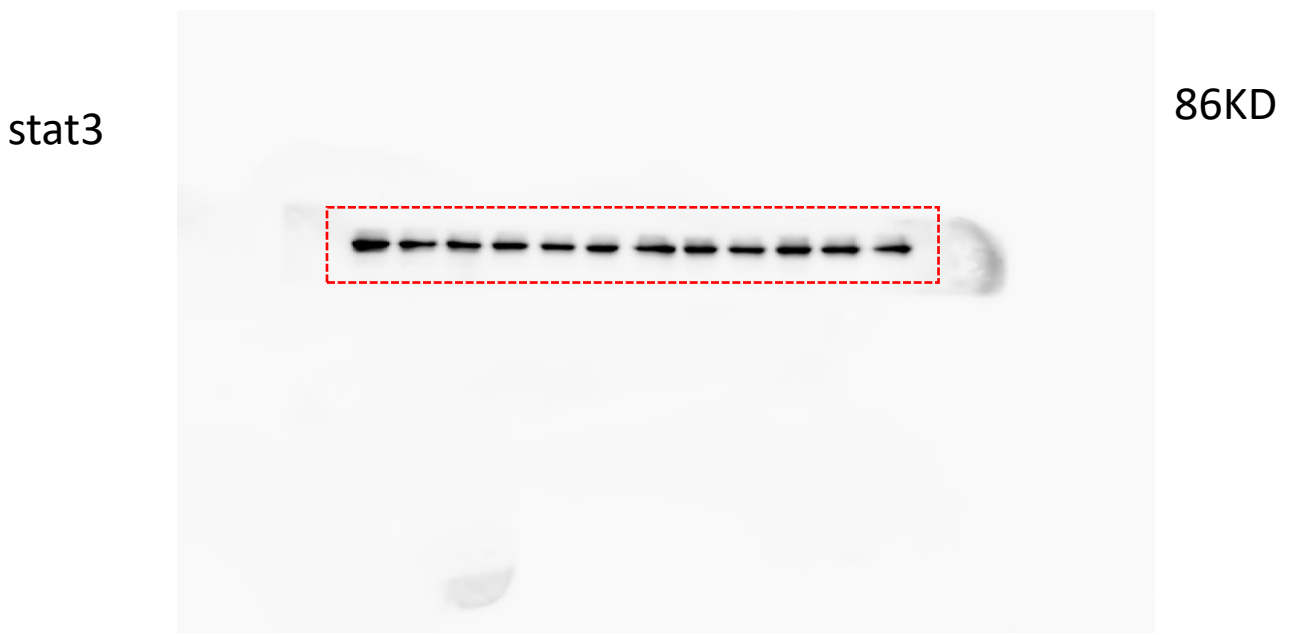

Figure 2C

p-P38

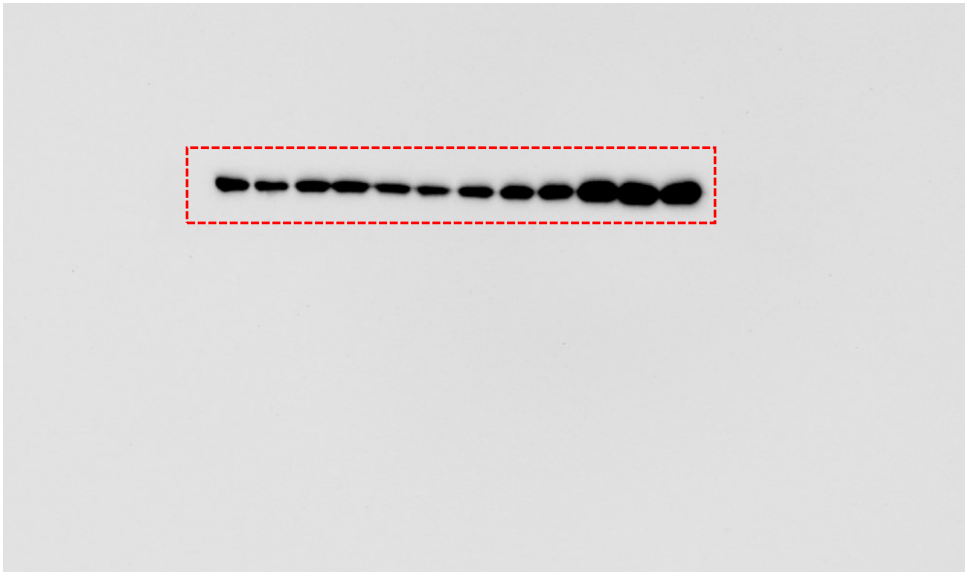

38KD

P38

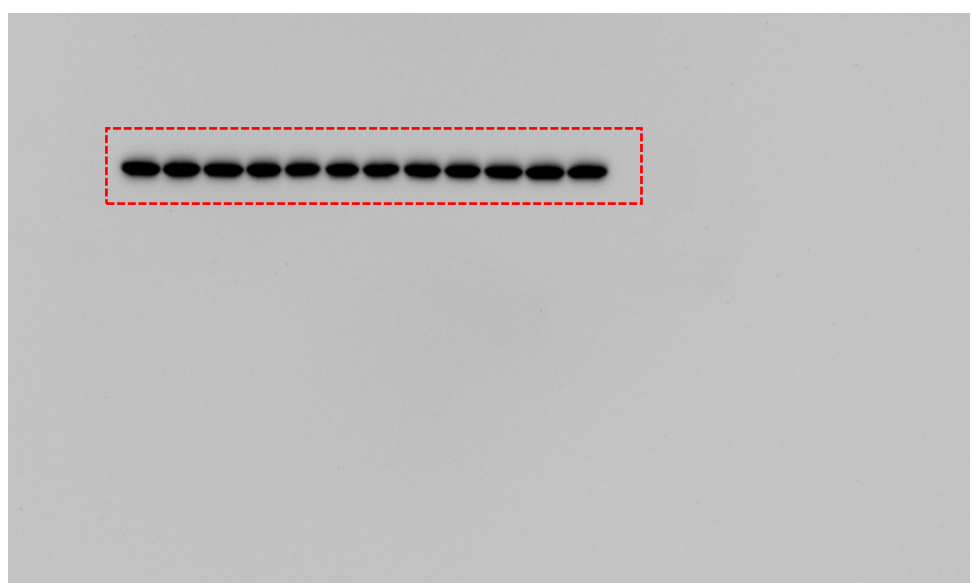

38KD

Figure 2C

p-ERK

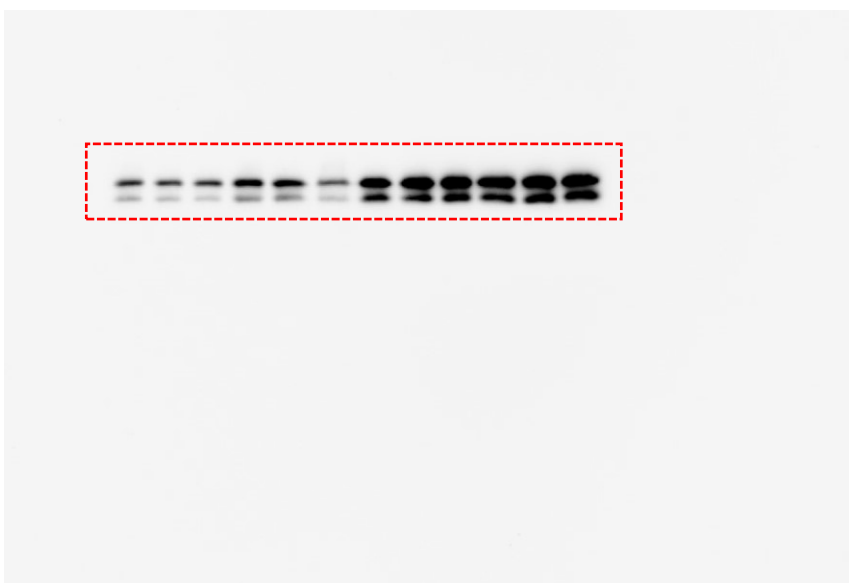

44KD  
42KD

ERK

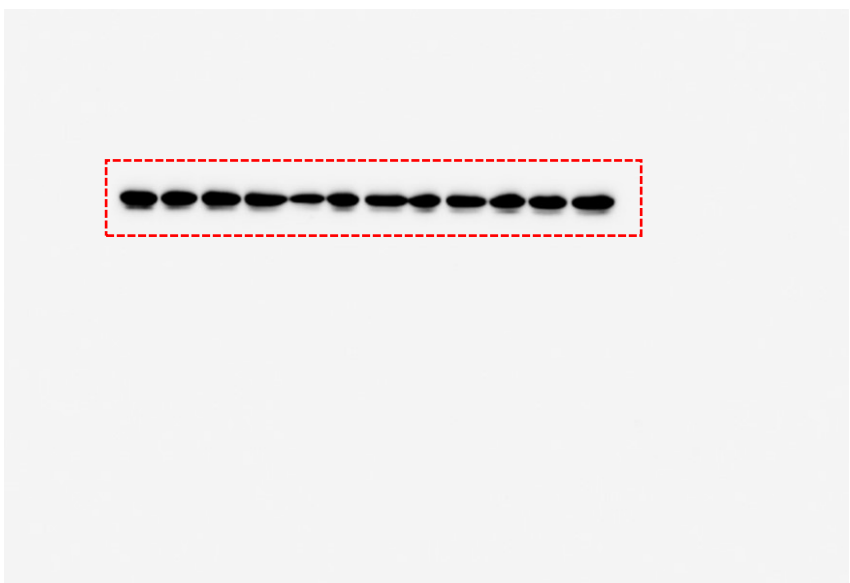

44KD  
42KD

GAPDH

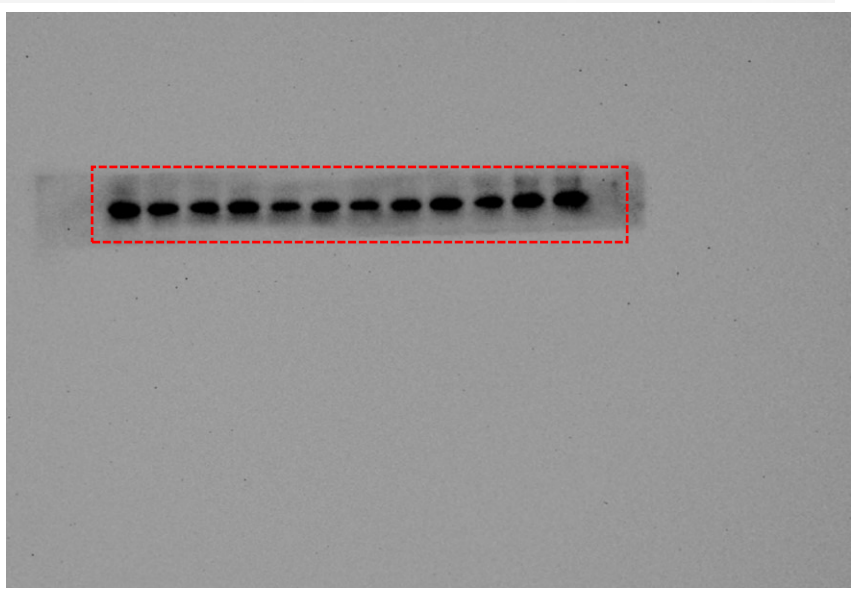

37KD

Figure 3C

p-ERK

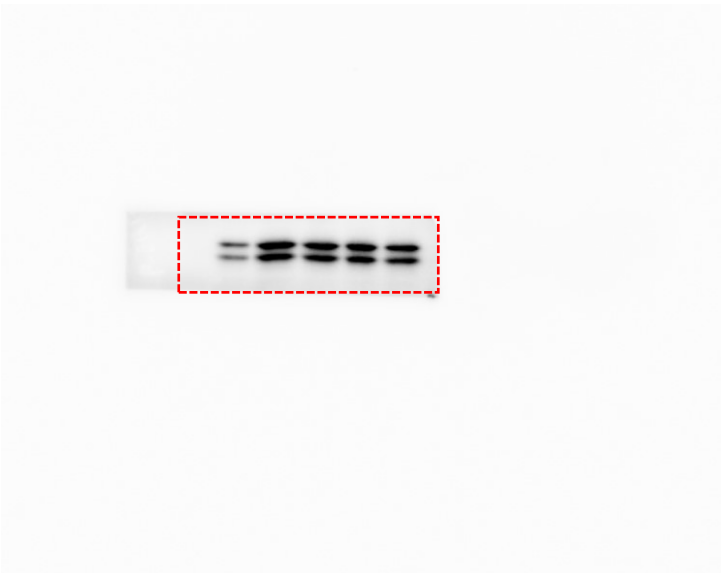

44KD  
42KD

ERK

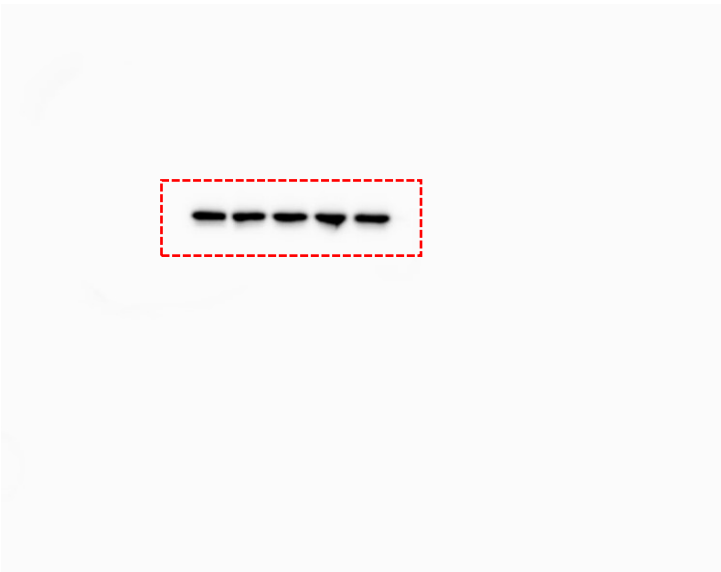

44KD  
42KD

Figure 3C

p-p38

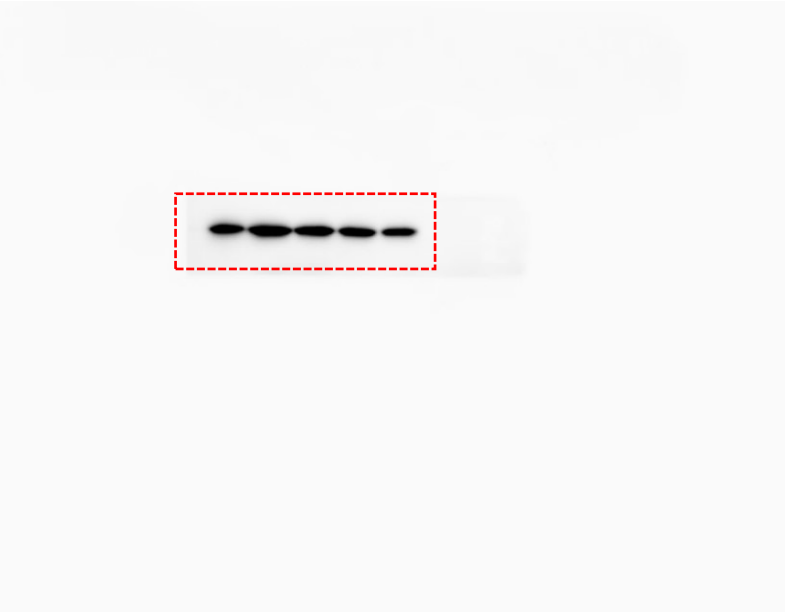

38KD

p38

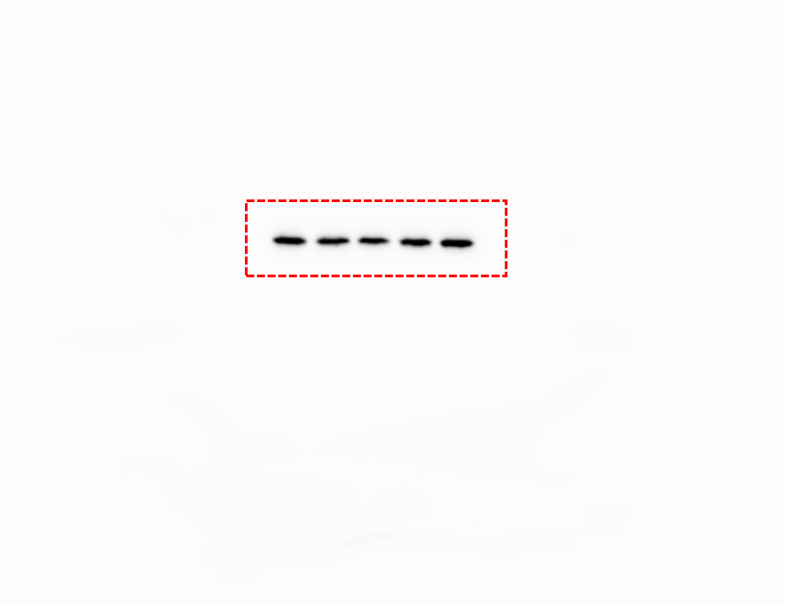

38KD

Figure 3C

p-stat3

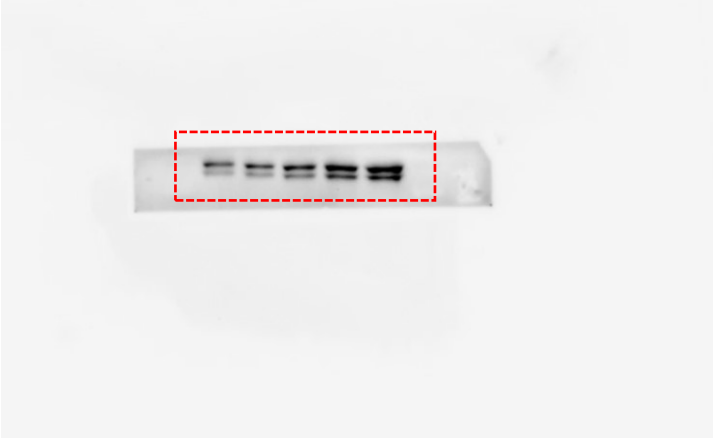

86KD

stat3

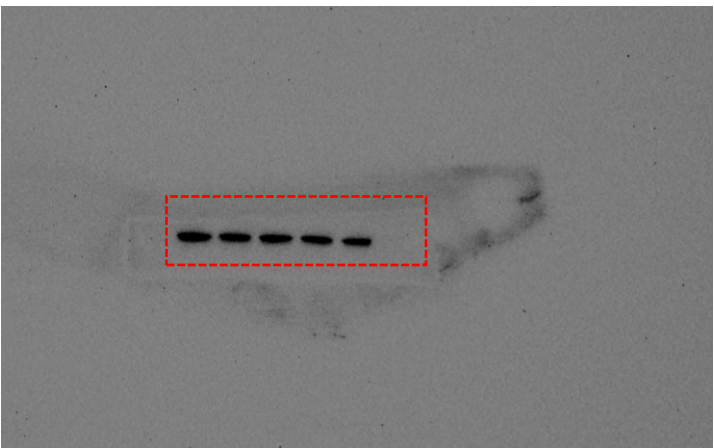

86KD

GAPDH

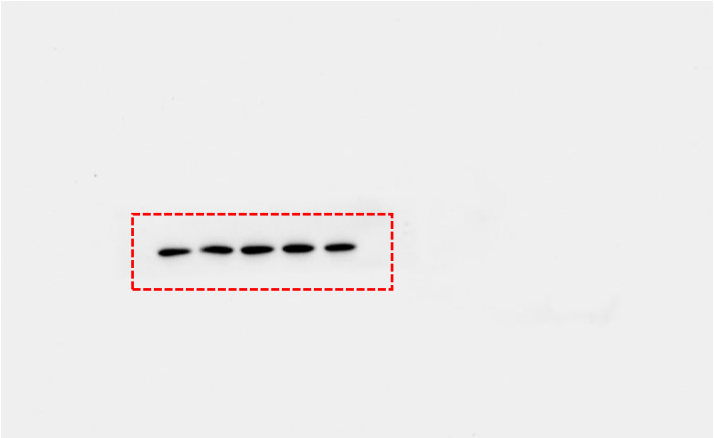

37KD



Figure 3D

p-stat3

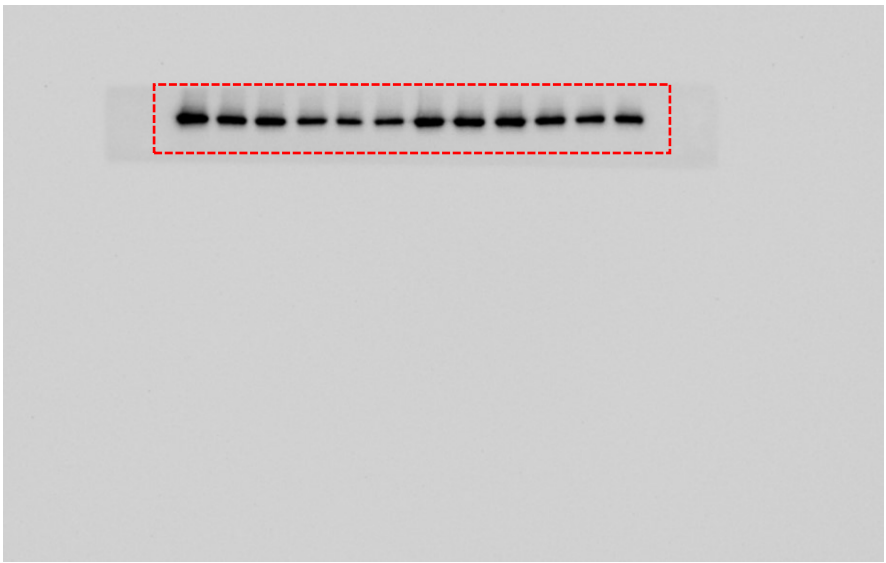

86KD

stat3

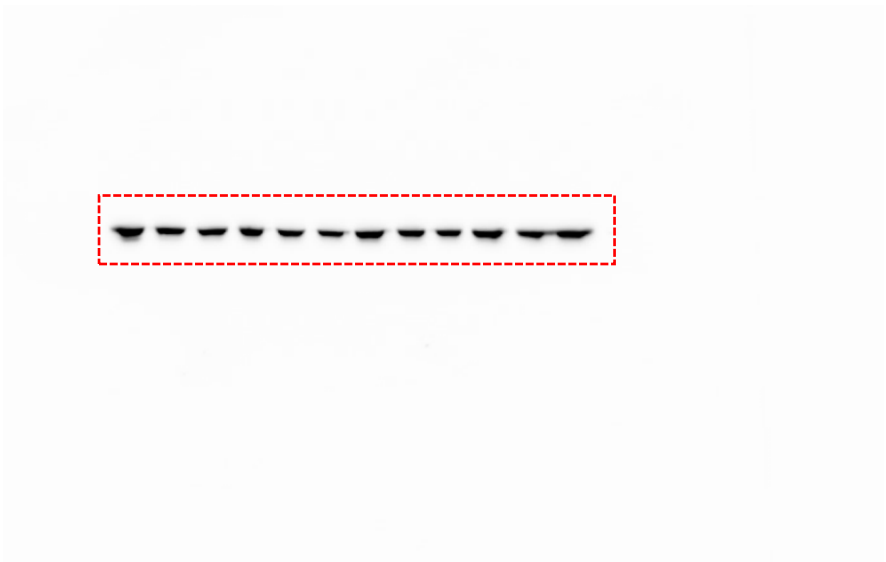

86KD

Figure 3D

p-p38

38KD

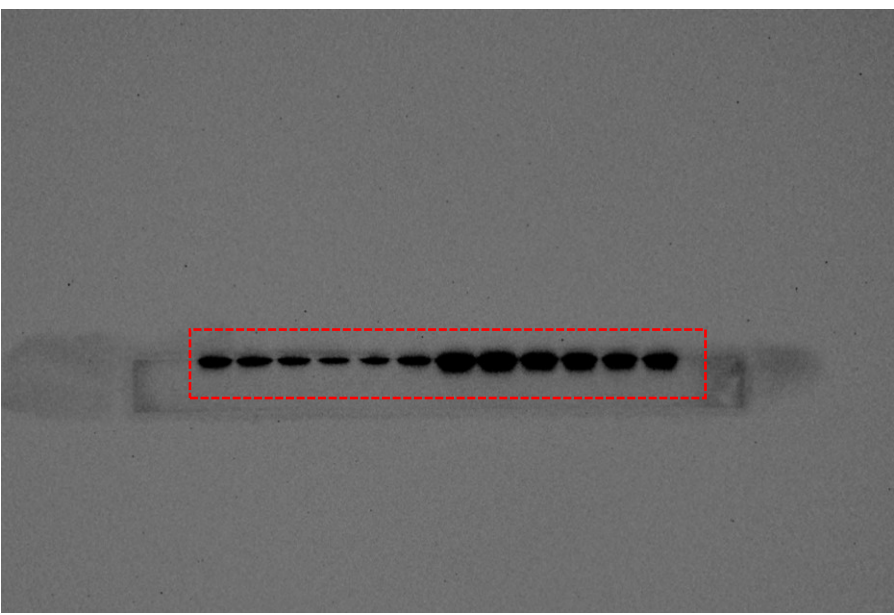

p38

38KD

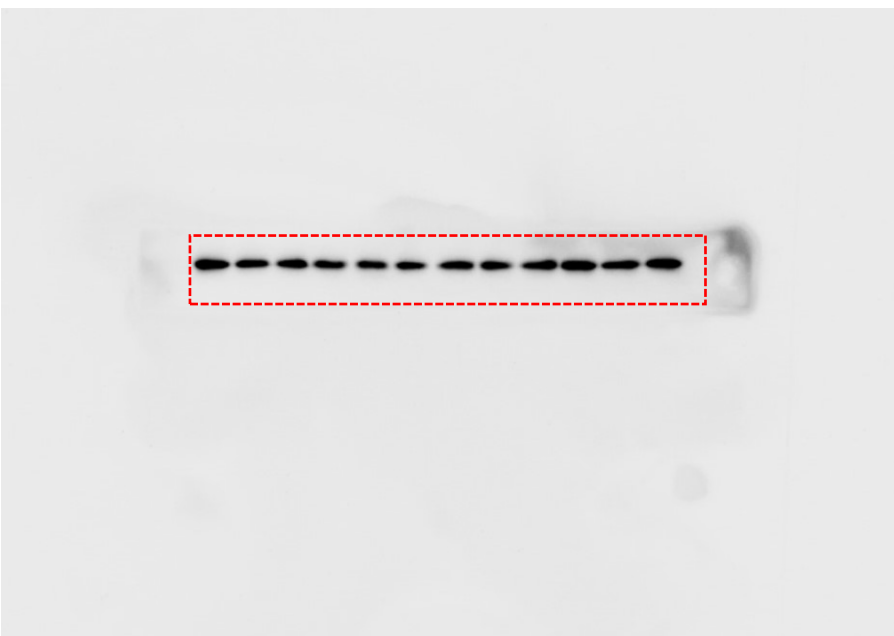

Figure 3D

p-ERK

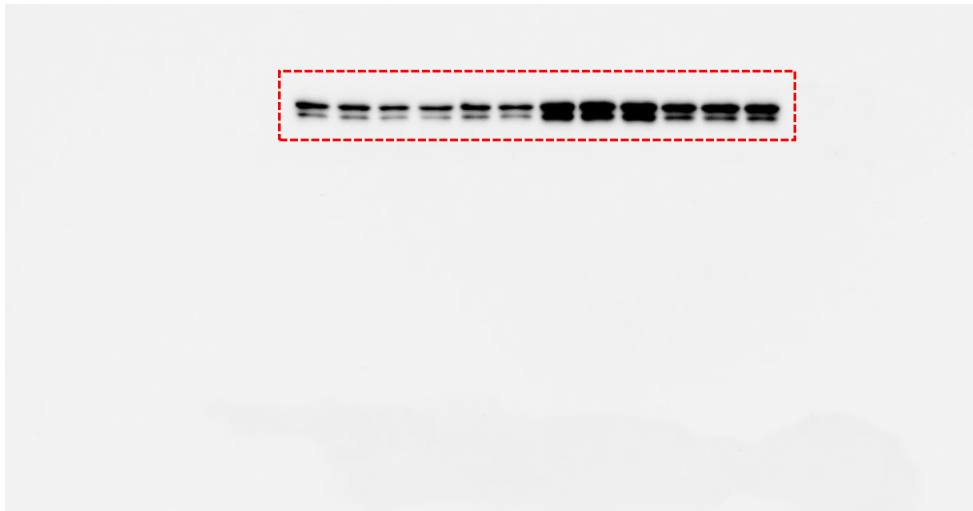

44KD  
42KD

ERK

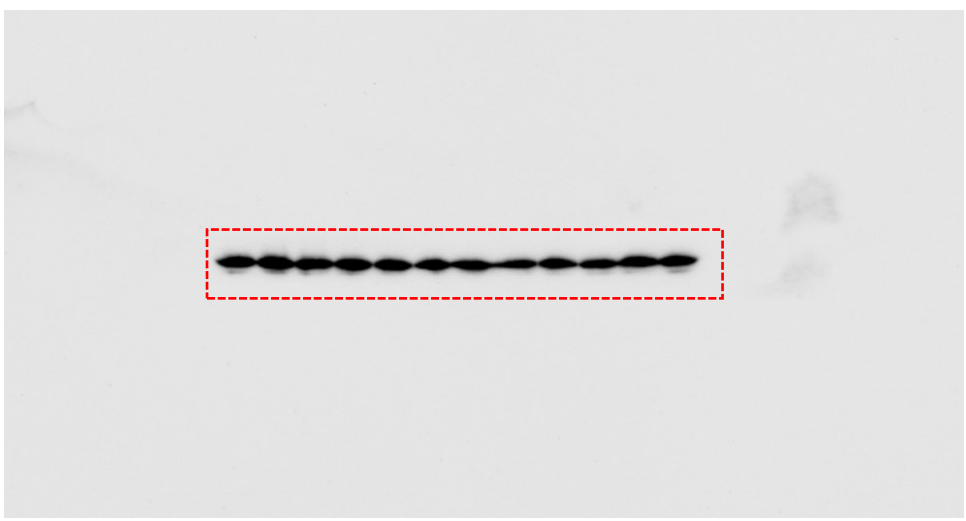

44KD  
42KD

GAPDH

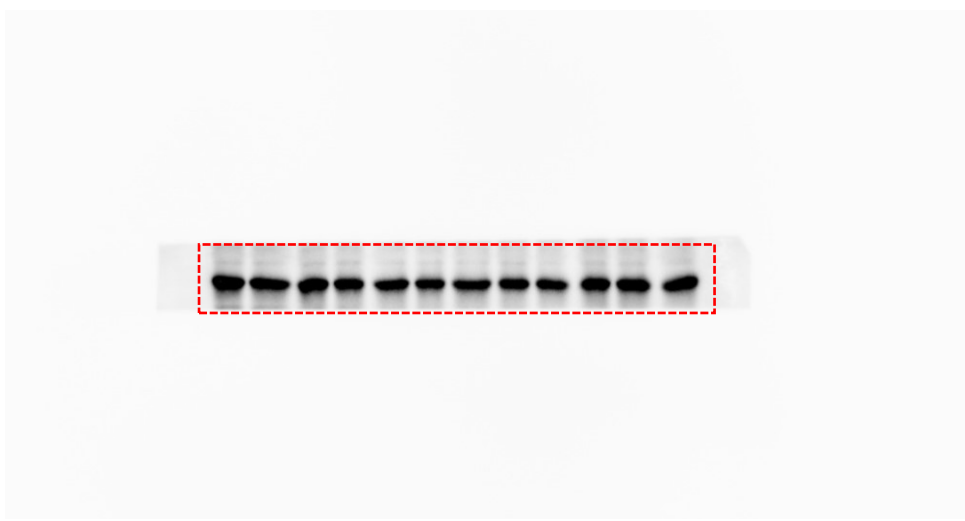

37KD

Figure 4B

Cleaved  
caspase3

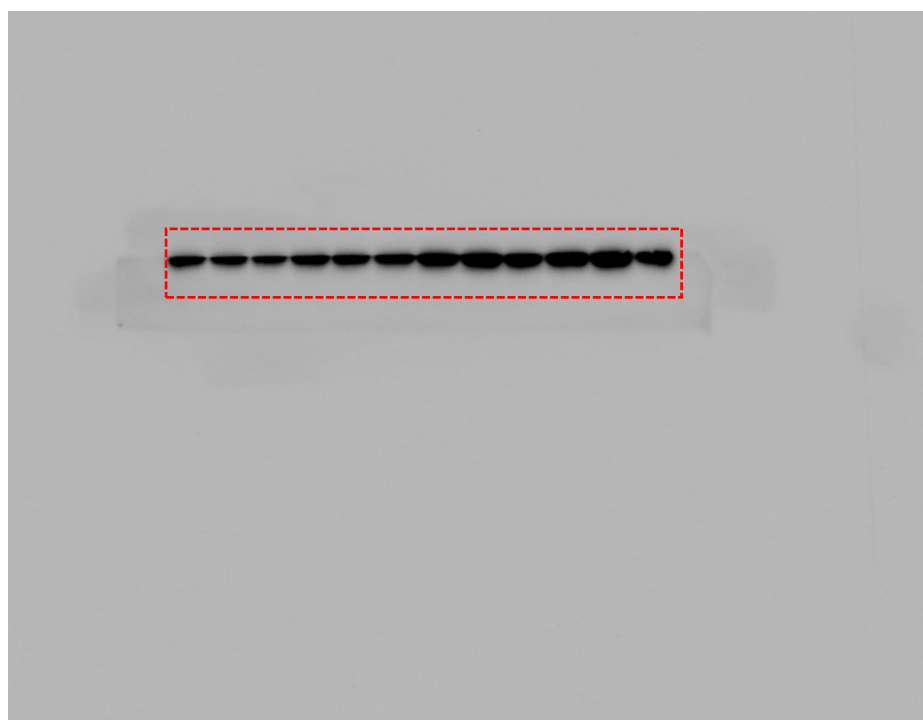

19KD

BCL2

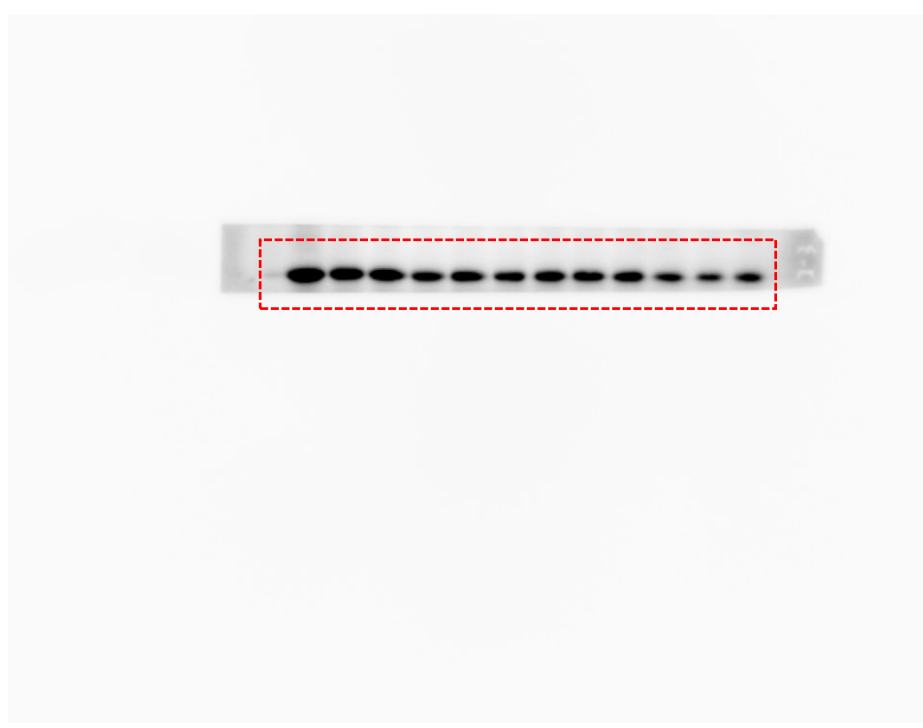

26KD

Figure 4B

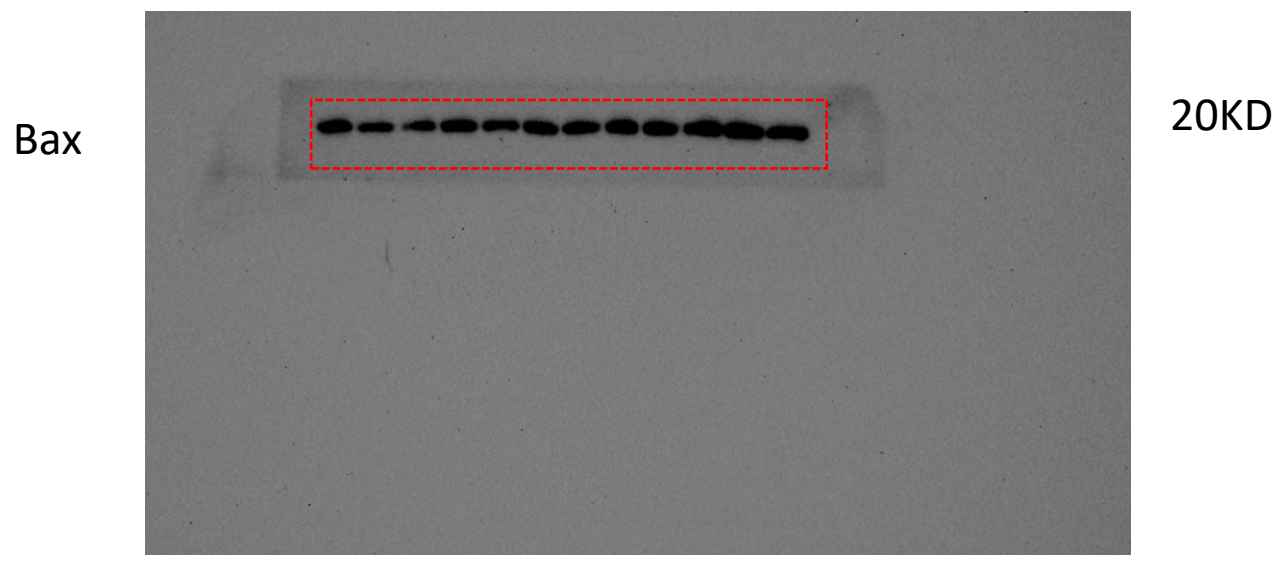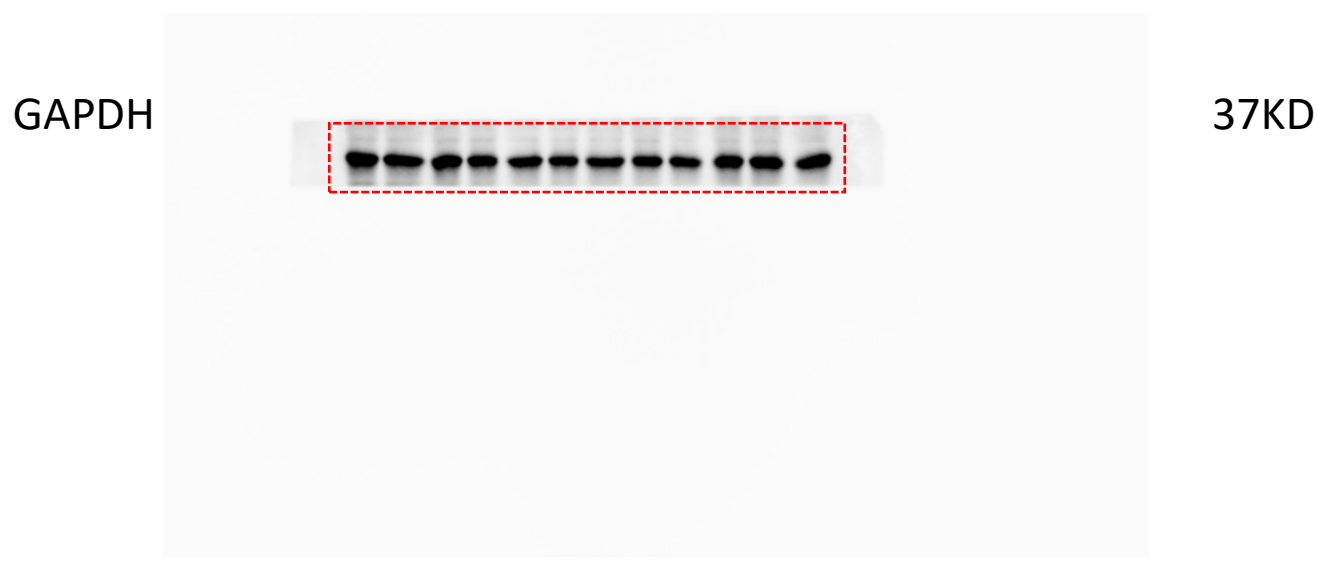

Figure 4D

p-AKT

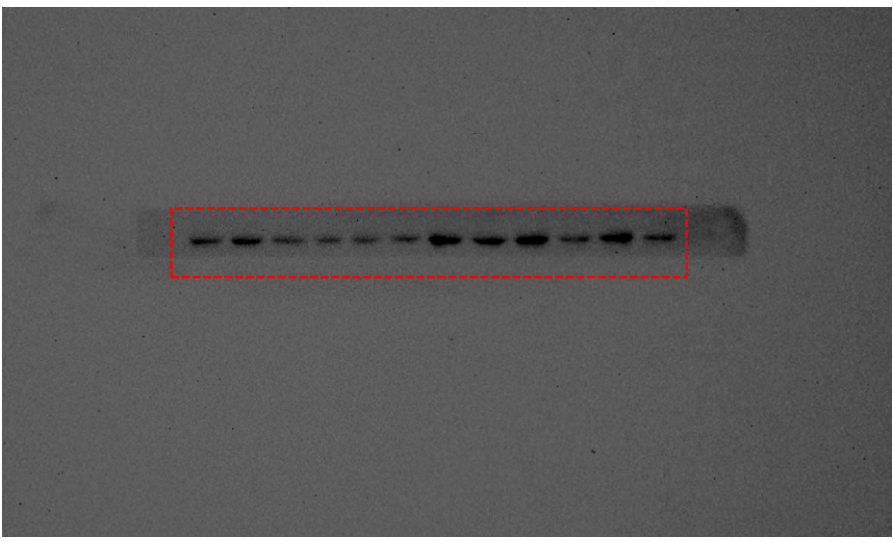

60KD

AKT

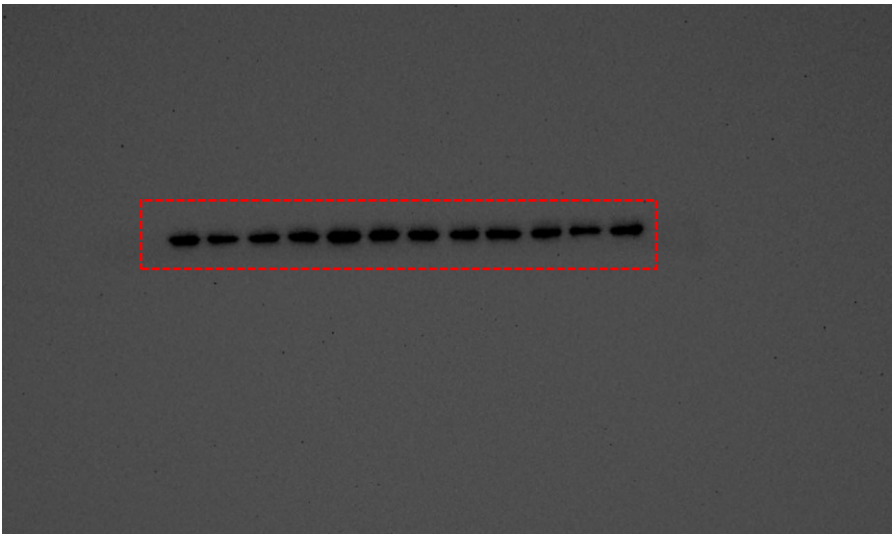

60KD

GAPDH

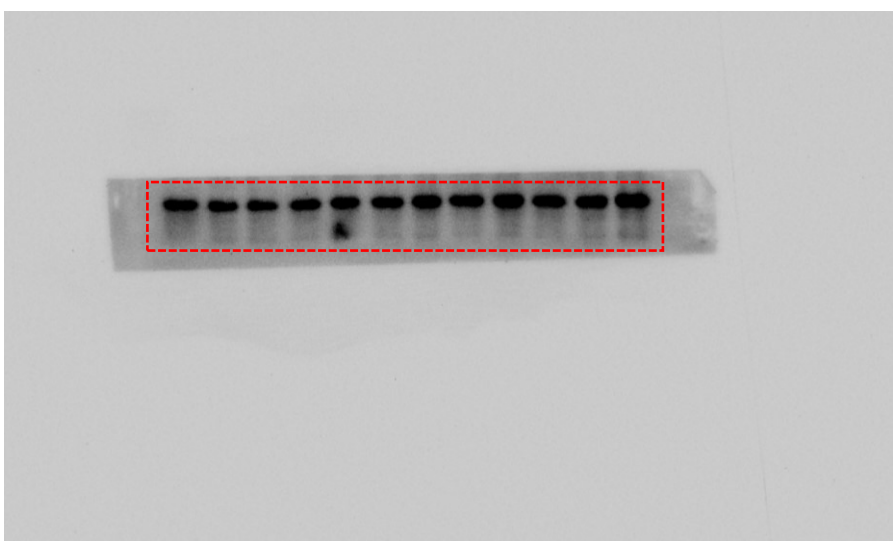

37KD

Figure 5B

Cleaved  
caspase3

19KD

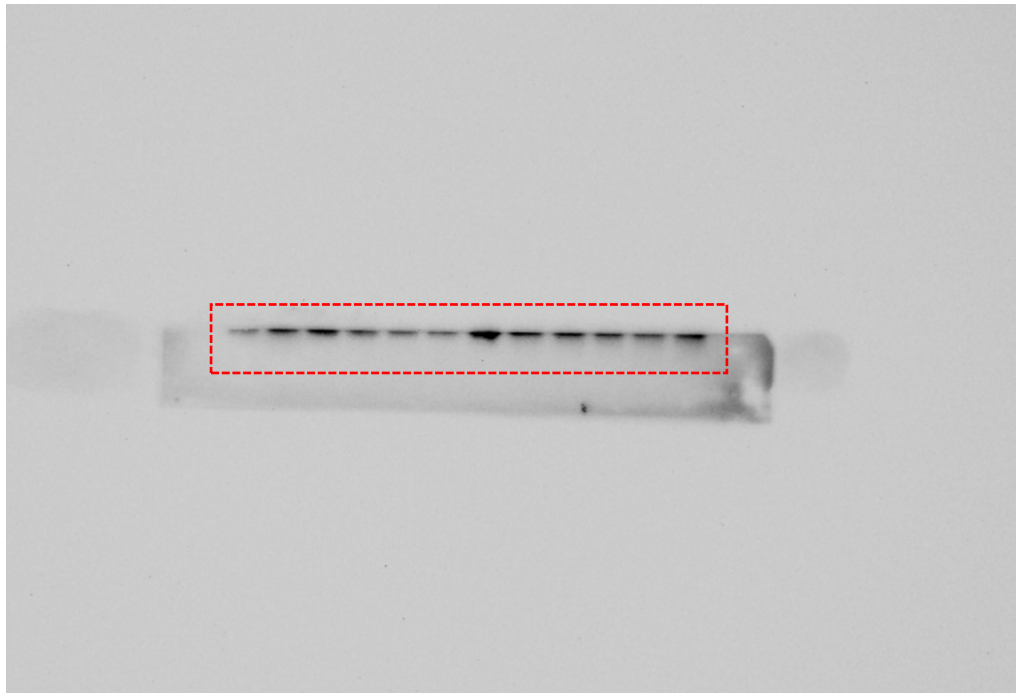

BAX

20KD

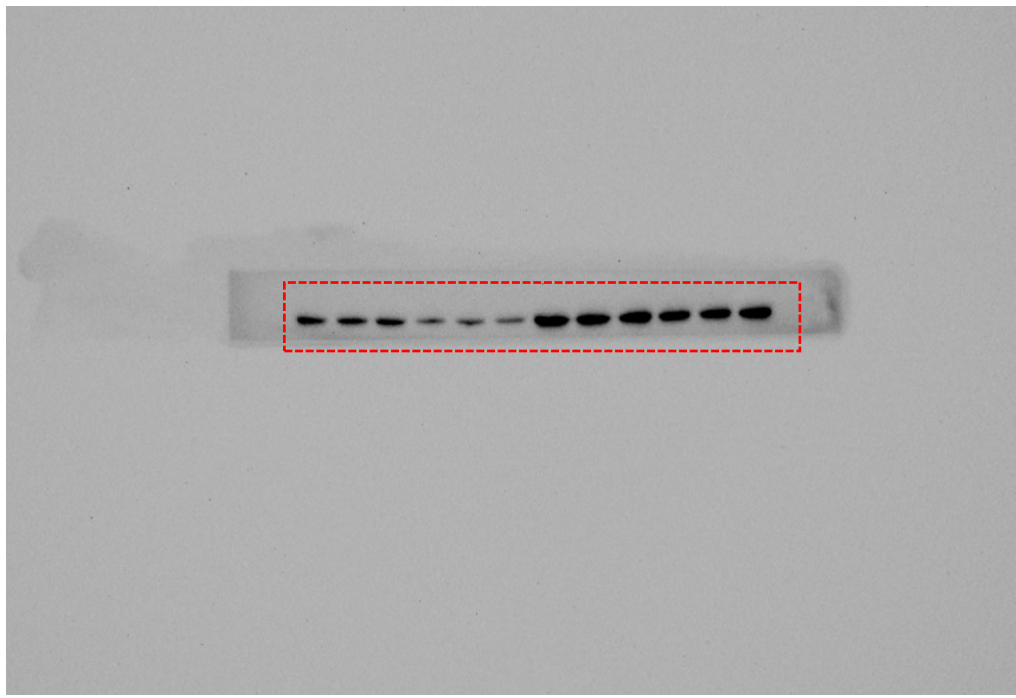

Figure 5B

BCL2

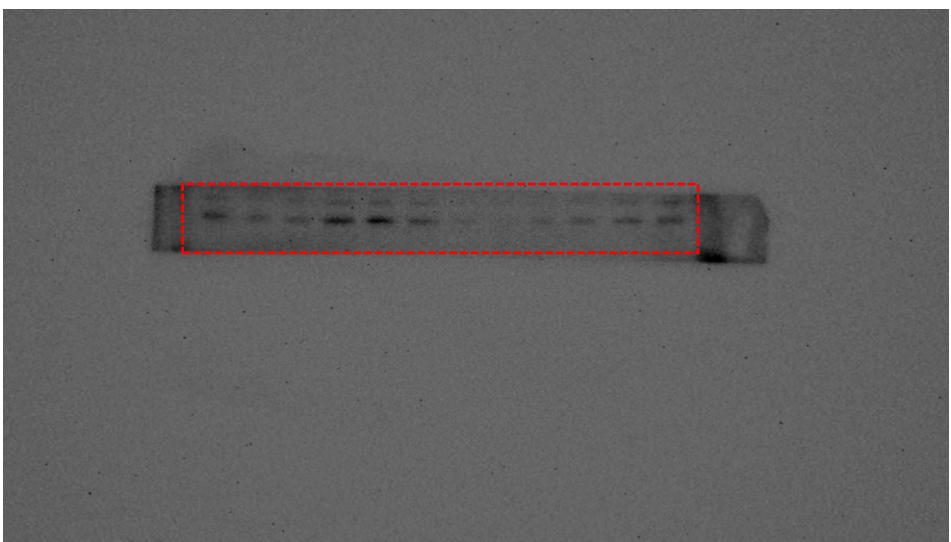

26KD

GAPDH

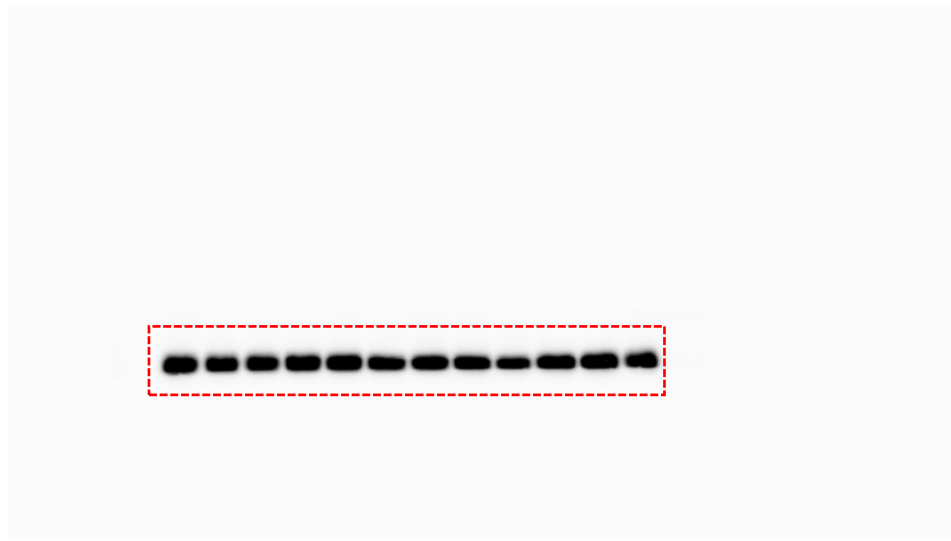

37KD



Figure 5D

P-AKT

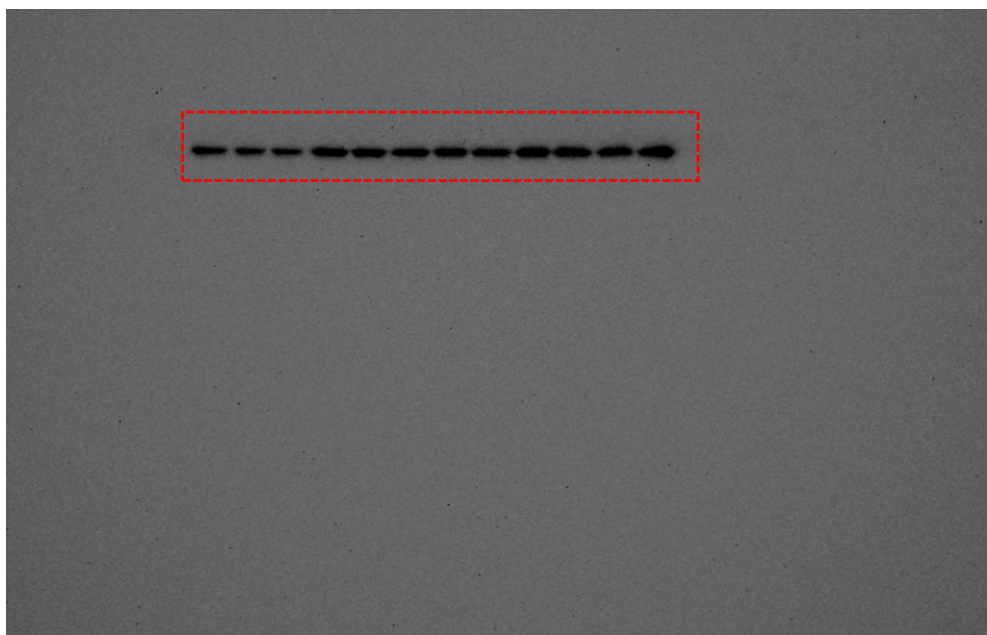

60KD

AKT

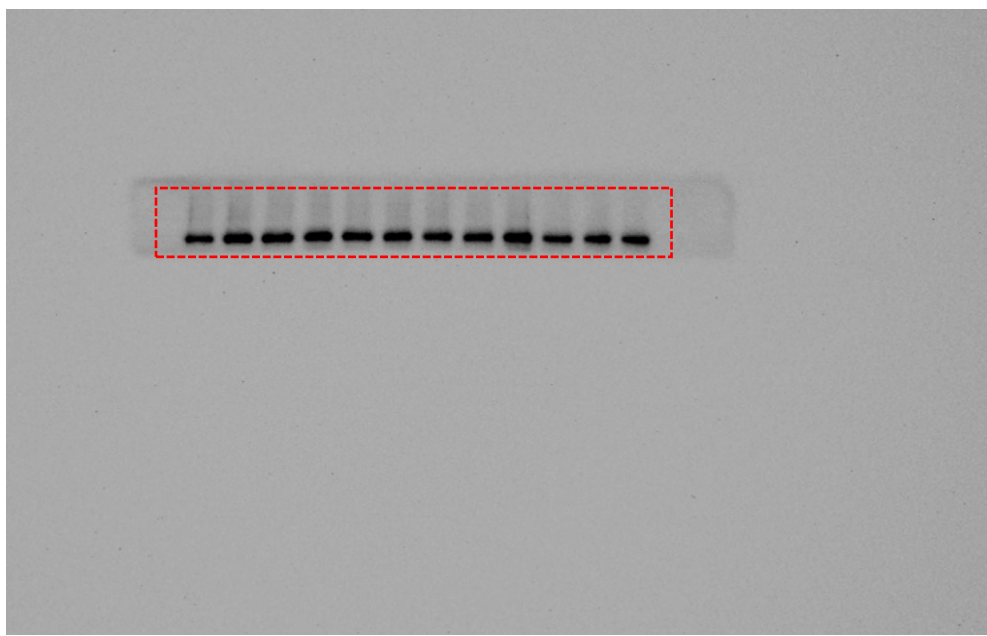

60KD

GAPDH

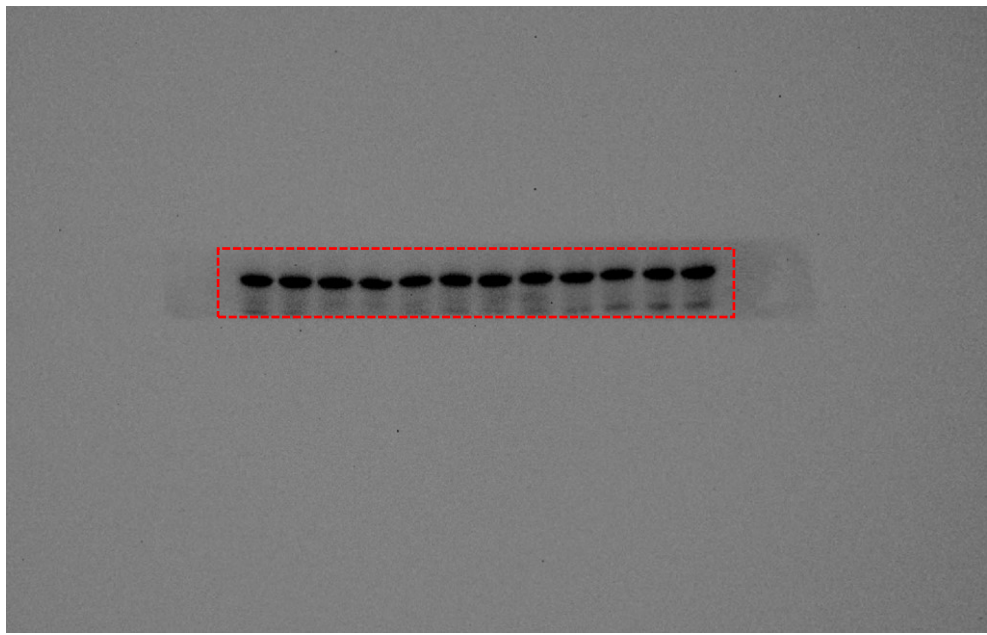

37KD

Figure 6B

Cleaved  
caspase 3

19KD

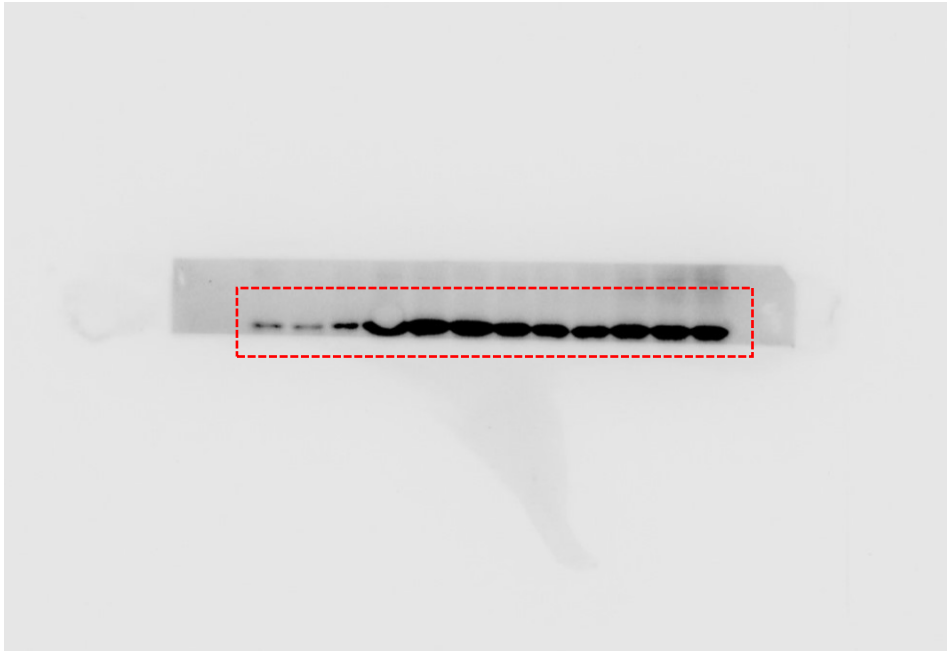

BAX

20KD

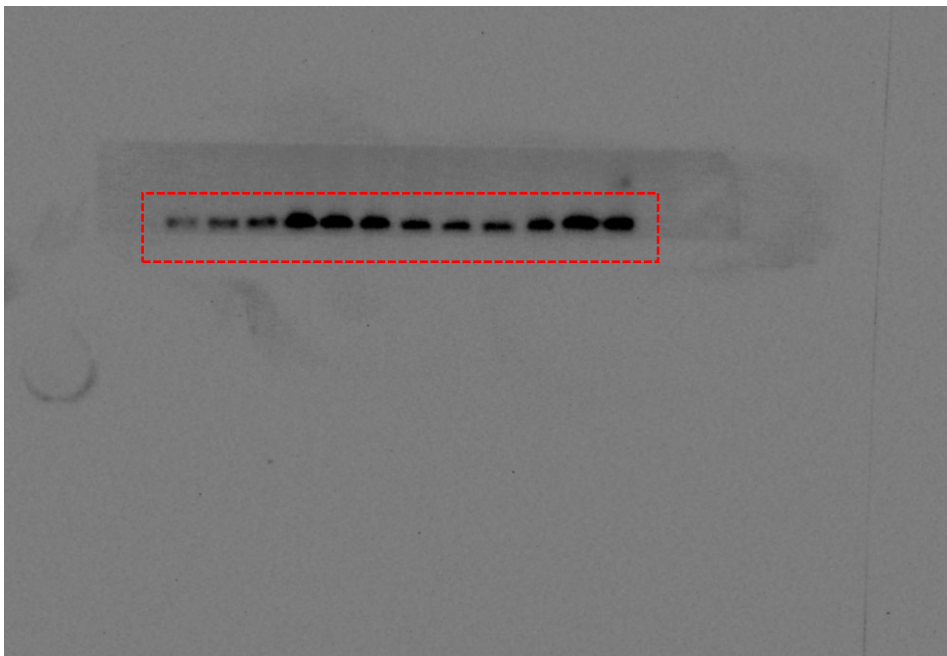

Figure 6B

BCL2

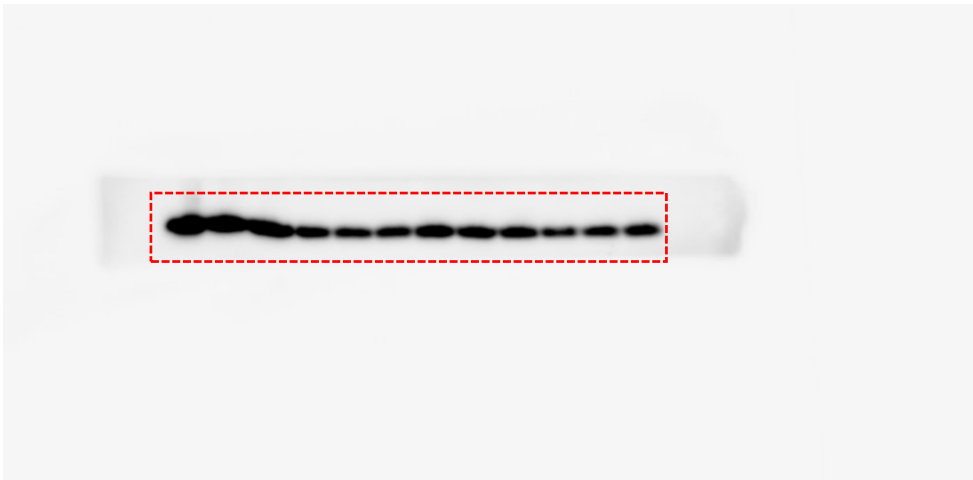

26KD

GAPDH

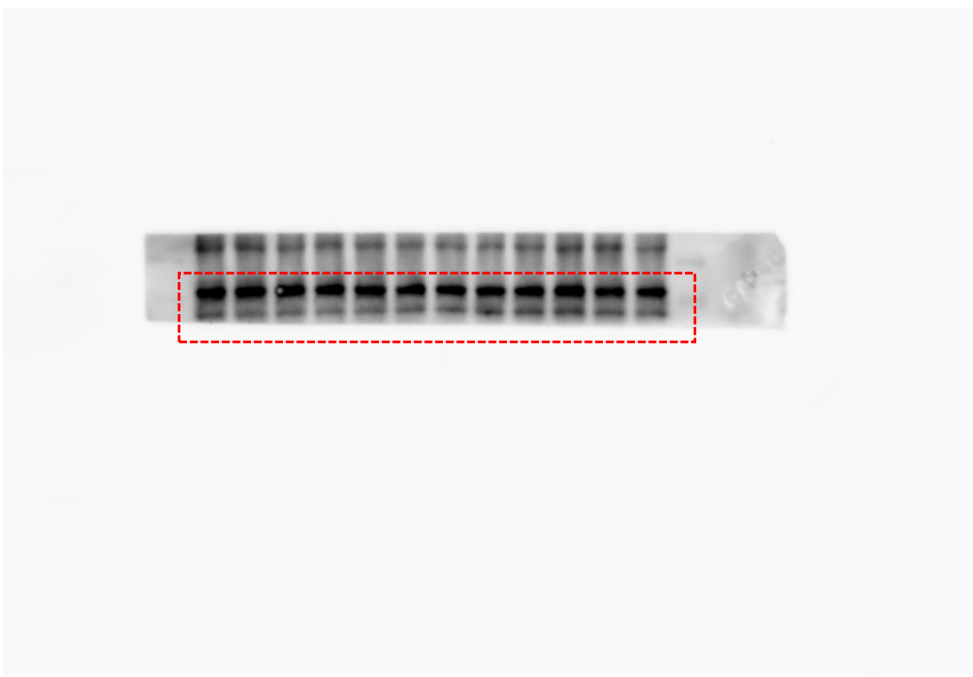

37KD
